# Supplementary material for: A novel protein kinase inhibitor IMB-YH-8 with anti-tuberculosis activity
Source: PubMed Central journal article supplement (PMC5506005; doi:10.1038/s41598-017-04108-7), 2017-07-11
Supplement: 41598_2017_4108_MOESM1_ESM.pdf [file 41598_2017_4108_MOESM1_ESM.pdf]

# **A novel protein kinase inhibitor IMB-YH-8 with anti-tuberculosis activity**

Jian Xu<sup>1,2</sup>, Ju-xian Wang<sup>1</sup>, Jin-ming Zhou<sup>1</sup>, Chang-liang Xu<sup>1</sup>, Bin Huang<sup>1</sup>, Yun Xing<sup>1</sup>, Bin Wang<sup>2</sup>, Rui Luo<sup>1</sup>, Yu-cheng Wang<sup>1</sup>, Xue-fu You<sup>1</sup>, Yu Lu<sup>2#</sup> and Li-yan Yu<sup>1#</sup>

<sup>1</sup>Institute of Medicinal Biotechnology, Chinese Academy of Medical Sciences and Peking Union Medical College, 1# Tian Tan Xi Li, Chongwen district, Beijing 100050, China

<sup>2</sup>Beijing Key Laboratory of Drug Resistance Tuberculosis Research, Beijing Tuberculosis and Thoracic Tumor Research Institute, Beijing Chest Hospital, Capital Medical University, Beijing 101149, China

#Corresponding authors.

Li-yan Yu, Tel: +86-010-63187118; Fax: +86-010-63187118; E-mail: yly@cpcc.ac.cn .

Yu Lu, Tel: +86-010-89509357; Fax: +86-010-80505770; E-mail: luyu4876@hotmail.com .

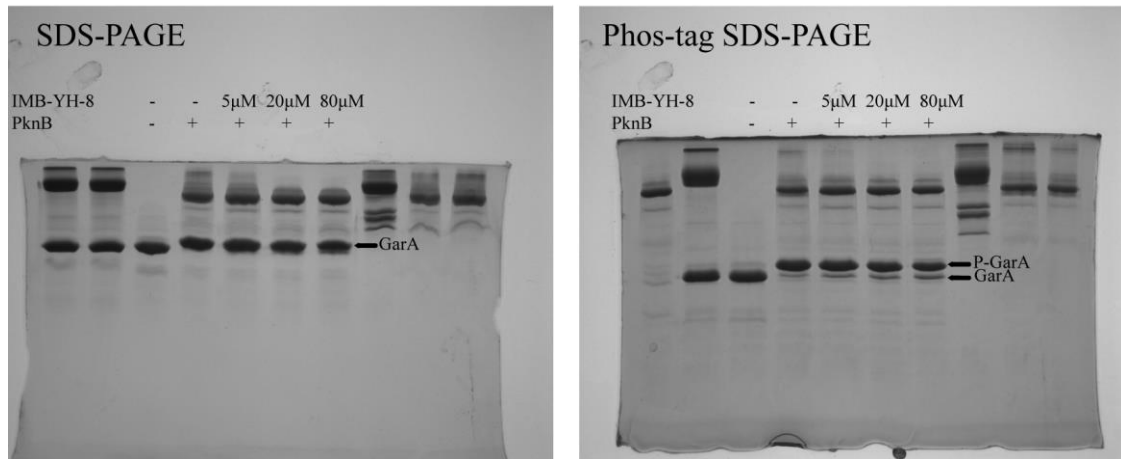

**Supplementary Figure 1: *In vitro* activity of IMB-YH-8 in substrate phosphorylation of GarA by PknB (full-length gels)**

**Table S1: Gene specific primers used in this study**

| Gene primers | Sequence                      |
|--------------|-------------------------------|
| Rv3914       | F: 5'-GAAGTCCGCCACCATCAA-3'   |
|              | R: 5'-GTCGCCCAAAGTCAACC-3'    |
| Rv3913       | F: 5'-TGCTGGTTGACTTTTGGG-3'   |
|              | R: 5'-GCGACGGTGAGGTCTGTT-3'   |
| Rv2466c      | F: 5'-AGTCTGTCGCCGATTTCT-3'   |
|              | R: 5'-CAGGTCGTCACGGTTTTTC-3'  |
| Rv3221A      | F: 5'-GACCACGACGATTCCCACG-3'  |
|              | R: 5'-AGACGCTCCCGCAAGCCCTC-3' |
| Rv3223c      | F: 5'-ACAGACGAGGAGTTGACC-3'   |
|              | R: 5'-GAACGAAATCCCGCATAG-3'   |
| SigA         | F: 5'-CGCGAAAAACCATCTG-3'     |
|              | R: 5'-GATCAGCCCCAGGTTG-3'     |
